# Supplementary material for: A dual-functional fluorescent nanoprobe based on UIO-66-NH2 for the continuous detection of o-phenylenediamine and Ag+
Source: Royal Society of Chemistry journal article supplement (doi:10.1039/d4nj03591g), 2024-01-01
Supplement: d4nj03591g1.pdf [file d4nj03591g1.pdf]

## Supplementary Information for

### A dual-functional fluorescent nanaoprobe based on UIO-66-NH<sub>2</sub> for continuous detection of o-phenylenediamine and Ag<sup>+</sup>

Yanmei Si<sup>a</sup>, Yansong Li<sup>a</sup>, Ranxu Zhou<sup>a</sup>, Xin Zhang<sup>b</sup>, Wei Liu<sup>c</sup>, Duyuan Yue<sup>d\*</sup> and Yehao Yan<sup>b\*</sup>

<sup>a</sup>*Institute of Forensic Medicine and Laboratory Medicine, Jining Medical University, Jining, Shandong, 272067, P.R. China*

<sup>b</sup>*School of Public Health, Jining Medical University, Jining, Shandong, 272067, PR China. yanyehao\_322@163.com.*

<sup>c</sup>*College of Chemistry and Chemical Engineering, Chemical Synthesis and Pollution Control Key Laboratory of Sichuan Province, China West Normal University, Nanchong, 637000, P.R. China.*

<sup>d</sup>*School of Materials Science and Engineering, Hunan Institute of Technology, Hengyang, Hunan, 421002, P.R. China*

#### **Chemicals**

o-Phenylenediamine (OPD), m-phenylenediamine (MPD), p-phenylenediamine (PPD), 2,3-Diaminophenazine (DAP), Zirconium chloride (ZrCl<sub>4</sub>), 2-amino-terephthalic acid (ATA), N, N-dimethylformamide (DMF), AgNO<sub>3</sub>, were obtained from Aladdin reagent company (Shanghai, China). All reagents and solvents were commercially available and used as received, without undergoing purification procedure.

#### **Synthesis of UIO-66-NH<sub>2</sub>**

UIO-66-NH<sub>2</sub> was synthesized using a solvothermal method based on a previously reported approach.<sup>[1]</sup> In summary, ZrCl<sub>4</sub> (1 mmol) and ATA (1 mmol/L) were

dissolved in DMF (50 mL) at room temperature, and the resulting mixture under constant stirring to form a clear solution. The resulting mixture was then transferred to a 100 mL Teflon reactor and maintained at 120 °C for 48 h. After cooling to room temperature, the faint yellow powder obtained was centrifuged, washed with DMF and methanol (each wash repeated at least three times) to remove any remaining unreacted ligands and metals, and finally dried under vacuum at 80 °C for 12 h.

### ***Density-functional theory (DFT) calculations***

DFT calculations were carried out using the CP2K code. A mixed Gaussian and planewave basis sets were employed to the calculations. Core electrons were represented with norm-conserving Goedecker-Teter-Hutter pseudopotentials, and the valence electron wavefunction was expanded in a double-zeta basis set with polarization functions along with an auxiliary plane wave basis set with an energy cutoff of 400 Ry. The generalized gradient approximation exchange-correlation functional of Perdew, Burke, and Enzerhof (PBE) was used. Each configuration was optimized with the Broyden-Fletcher-Goldfarb-Shanno (BGFS) algorithm with SCF convergence criteria of  $3 \times 10^{-6}$  au. To compensate the long-range van der Waals dispersion interaction between the adsorbate and the zeolite, the DFT-D3 scheme with an empirical damped potential term was added into the energies obtained from exchange-correlation functional in all calculations.

Table S1. Energy spectrum quantitative analysis report of UIO-66-NH<sub>2</sub>

| UIO-66-NH <sub>2</sub> | C     | O     | Zr    | N    | Total  |
|------------------------|-------|-------|-------|------|--------|
| wt%                    | 40.72 | 19.27 | 36.02 | 3.99 | 100.00 |

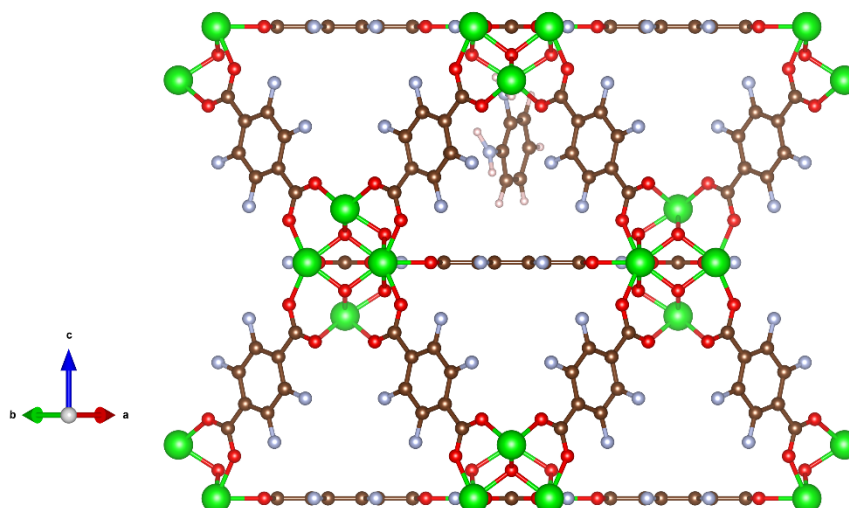

Fig. S1 Diagram of H-bond between o-phenylenediamine and MOFs

Table S2. Comparison of detection performances among different assays for Ag<sup>+</sup> detection.

| Detection methods     | Linear ranges<br>( $\mu\text{M}$ ) | Detection limits<br>( $\mu\text{M}$ ) | Ref.      |
|-----------------------|------------------------------------|---------------------------------------|-----------|
| Fluorescence analysis | 0-90                               | 0.32                                  | [2]       |
| Fluorescence analysis | 0-16                               | 0.87                                  | [3]       |
| Colorimetric analysis | 1.07-375                           | 0.41                                  | [4]       |
| Colorimetric analysis | 0.50-1000                          | 0.50                                  | [5]       |
| Fluorescence analysis | 0.31-225                           | 0.28                                  | This work |

Table S3. Determination of Ag<sup>+</sup> in water samples.

| Sample        | Ag <sup>+</sup> spiked ( $\mu\text{M}$ ) | Measured<br>concentration ( $\mu\text{M}$ ) | Recovery (%) | RSD (% , n=3) |
|---------------|------------------------------------------|---------------------------------------------|--------------|---------------|
| Mineral water | 0                                        | 0.40                                        | -            | -             |
|               | 0.875                                    | 1.38                                        | 108          | 8.9           |
|               | 1                                        | 1.39                                        | 94           | 8.6           |

## Reference

- [1] C. I. Ezugwu, S. P. Zhang, S. P. Li, S. R. Shi, C. H. Li, F. Verpoort, J. G. Yu, S. W. Liu, Efficient transformative HCHO capture by defective NH<sub>2</sub>-UiO-66(Zr) at room temperature,

Environmental Science: Nano, 2019, 6, 2931-2936.

[2] X. H. Gao, Y. Z. Lu, R. Z. Zhang, S. J. He, J. Ju, M. M. Liu, L. Li, W. Chen, One-pot synthesis of carbon nanodots for fluorescence turn-on detection of  $\text{Ag}^+$  based on the  $\text{Ag}^+$ -induced enhancement of fluorescence, *Journal of Materials Chemistry C*, 2015, 3, 2302-2309.

[3] Y. Li, H. J. Yu, G. Shao, F. Gan, A tetraphenylethylene-based “turn on” fluorescent sensor for the rapid detection of  $\text{Ag}^+$  ions with high selectivity, *Journal of Photochemistry and Photobiology A: Chemistry*, 2015, 301, 14-19.

[4] J. Bian, Y. X. Xia, L. Y. Sang, C. X. Zhu, Y. X. Li, G. Y. Li, X. Y. Liu, X. Wang, Y. Liu, A recyclable colorimetric probe: in situ fabrication of highly stable HPEI–AuNPs for selective  $\text{Ag}^+$  detection, *New Journal of Chemistry*, 2020, 44, 5438-5447

[5] Y. P. Qu, I. Yakub, R. Bains, W. S. Hu, L. Z. Wang,  $\text{Ag}^+$  colorimetric sensor based on graphene oxide/nano-platinum composite, *Journal of Analytical Science and Technology*, 2023, 14, 35.
